# Supplementary material
Source: Frontiers journal article supplement (https://www.frontiersin.org/articles/409999)
Supplement: Data_Sheet_1.PDF [file Data_Sheet_1.PDF]

## WAV FILE DESCRIPTIONS

The following files contain the recordings of our experimental stimuli as created in Praat Vowel Editor:

- 1) the original speaker's F1 and F2 values over the original speaker's F0
- 2) values obtained from Canonical Correlation over the original speaker's F0 thus to 'reconstruct' spoken vowels from brain activity, at group level and, for reference, in the top-performing subject(s) and region(s).

## FILENAMES

behavioral\_7\_VWL\_x\_bckwd = vowels i e E a 0 o U with F0, F1, F2 values of the original speaker.

behavioral\_U\_A\_I = vowels U A I with F0, F1, F2 values of the original speaker.

brain\_ifg\_7\_VWL\_x\_bckwd = vowels i e E a 0 o U with F0 of original speaker, and F1, F2 values reconstructed from brain activity in the inferior frontal gyrus. Group level.

brain\_ifg\_sub\_04\_U\_A\_I = vowels U A I with F0 of original speaker, and and F1, F2 values reconstructed from brain activity in the inferior frontal gyrus of subject 04 (best performer in the region).

brain\_ifg\_U\_A\_I = vowels U A I with F0 of original speaker, and F1, F2 values reconstructed from brain activity in the inferior frontal gyrus. Group level.

brain\_sts\_7\_VWL\_x\_bckwd = vowels i e E a 0 o U with F0 of original speaker, and F1, F2 values reconstructed from brain activity in the superior temporal sulcus. Group level.

brain\_sts\_sub\_05\_U\_A\_I = vowels U A I with F0 of original speaker, and F1, F2 values reconstructed from brain activity in the superior temporal sulcus of subject 05 (best performer in that region).

brain\_sts\_U\_A\_I = vowels U A I with F0 of original speaker, and F1, F2 values reconstructed from brain activity in the superior temporal sulcus. Group level.
